# Supplementary material for: Learning a Weighted Sequence Model of the Nucleosome Core and Linker Yields More Accurate Predictions in Saccharomyces cerevisiae and Homo sapiens
Source: PLOS journal article supplement (doi:10.1371/journal.pcbi.1000834), 2010-07-08
Supplement: S5 (10.1371/journal.pcbi.1000834.s005) [file journal.pcbi.1000834.s005]

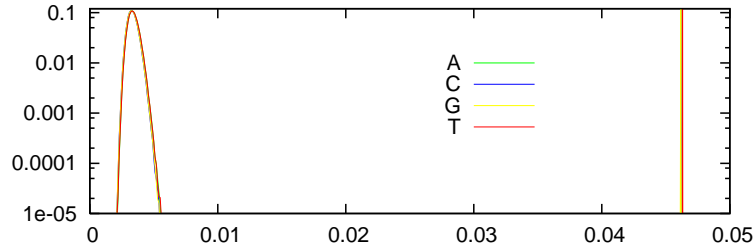

(a) Null model distributions and observed  $\Delta$ 's

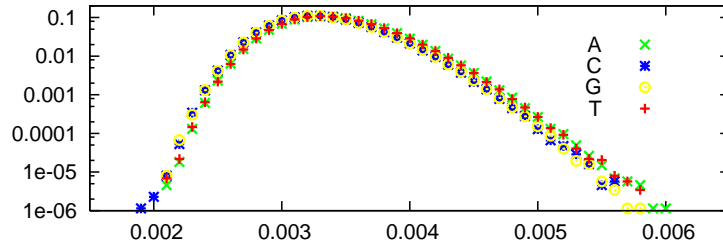

(b) Null model distributions

Figure S3: The x-axis represents the maximum absolute variation observed in a mono-nucleotide pattern derived by averaging 438,000 individual DNA sequences of length 151 bp each. The null-model distribution was obtained empirically from 800,000 random sets of DNA fragments. (a) shows the null model distributions based on random sampling for each of the 4 nucleotides as well as the observed  $\Delta$ 's based on the nucleosome pattern derived from the Zhang positions, and (b) shows the null distributions at higher resolution.
