# Supplementary material for: Learning a Weighted Sequence Model of the Nucleosome Core and Linker Yields More Accurate Predictions in Saccharomyces cerevisiae and Homo sapiens
Source: PLOS journal article supplement (doi:10.1371/journal.pcbi.1000834), 2010-07-08
Supplement: S10 (10.1371/journal.pcbi.1000834.s010) [file journal.pcbi.1000834.s010]

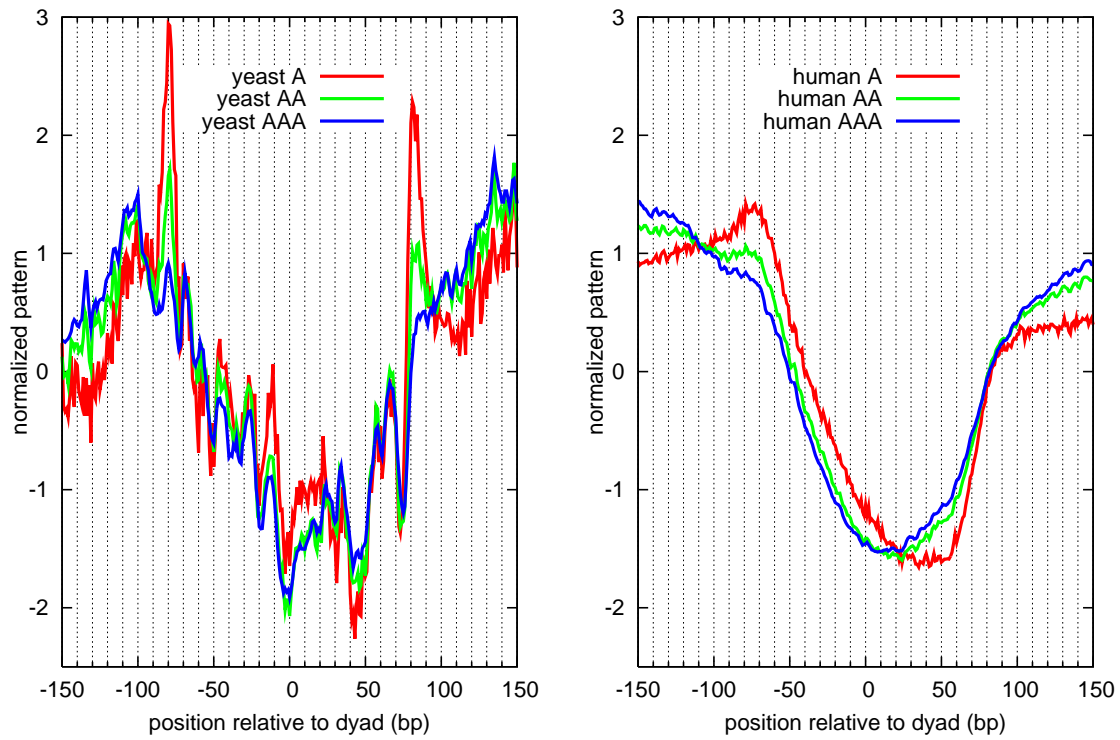

Figure S8: These figures show the yeast and human nucleosome patterns for A, AA, and AAA. Note that these yeast patterns still contain the MNase artifact, which was most apparent in the A pattern. The Pearson correlation coefficients for each yeast pattern and the corresponding human pattern are: A:0.77, AA:0.88, and AAA:0.91, suggesting that the underlying oscillation which these patterns have in common plays a role in positioning nucleosomes across species.
